# Supplementary material
Source: PubMed Central journal article supplement (PMC4646201)
Supplement: supp_M115.660803_jbc.M115.660803-1.pdf [file supp_M115.660803_jbc.M115.660803-1.pdf]

# Supporting Information

## Bacteriophage-mediated glucosylation can modify lipopolysaccharide O antigens synthesized by an ABC transporter-dependent assembly mechanism

Evan Mann, Olga G. Ovchinnikova, Jerry D. King, and Chris Whitfield\*

From the Department of Molecular and Cellular Biology, University of Guelph, Guelph, Ontario, N1G 2W1, Canada

\*To whom correspondence should be addressed: Chris Whitfield, Dept. of Molecular and Cellular Biology, University of Guelph, 50 Stone Rd. East, Guelph, Ontario, N1G 2W1, Canada. Tel.: 519-824-4120 (Ext. 53361); E-mail: cwhitfie@uoguelph.ca.

E.M. and O.G.O. contributed equally to this work.

### Content

2D NMR spectra of the O-polysaccharide from *E. coli* CWG1217  $\Delta_{wzx-wbbK}$  transformed with the *R. terrigena* O-antigen gene cluster (pKM114).

Fig. S1.  $^1\text{H}, ^1\text{H}$  COSY spectrum

Fig. S2.  $^1\text{H}, ^1\text{H}$  TOCSY spectrum

Fig. S3.  $^1\text{H}, ^1\text{H}$  NOESY spectrum

Fig. S4.  $^1\text{H}, ^{13}\text{C}$  HMBC spectrum

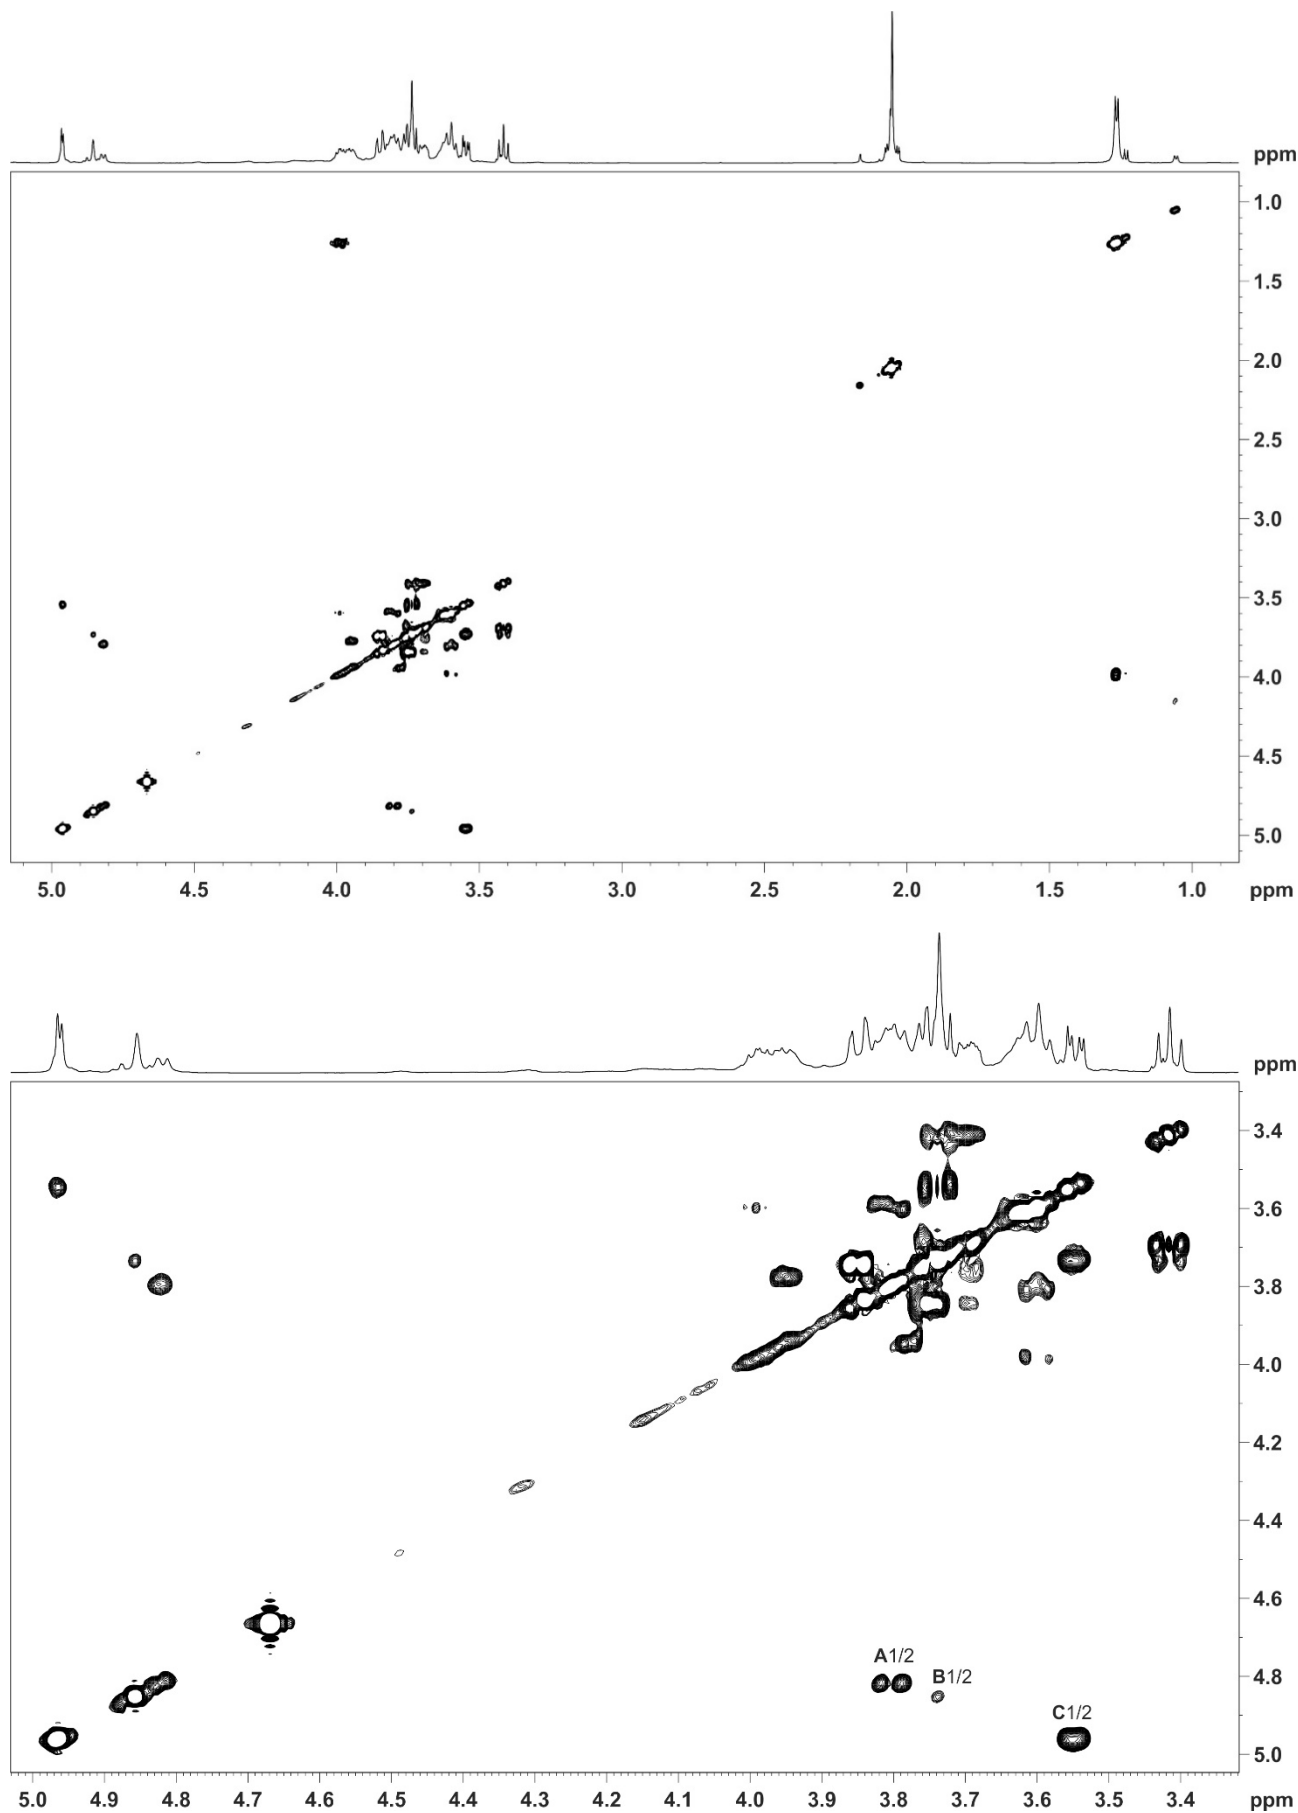

**Figure S1.** Full (top) and expanded (bottom)  $^1\text{H}, ^1\text{H}$  COSY spectrum. Correlations between anomeric and ring protons are indicated. Sugar residues are designated as **A** (GlcNAc), **B** (Rha) and **C** (Glc).

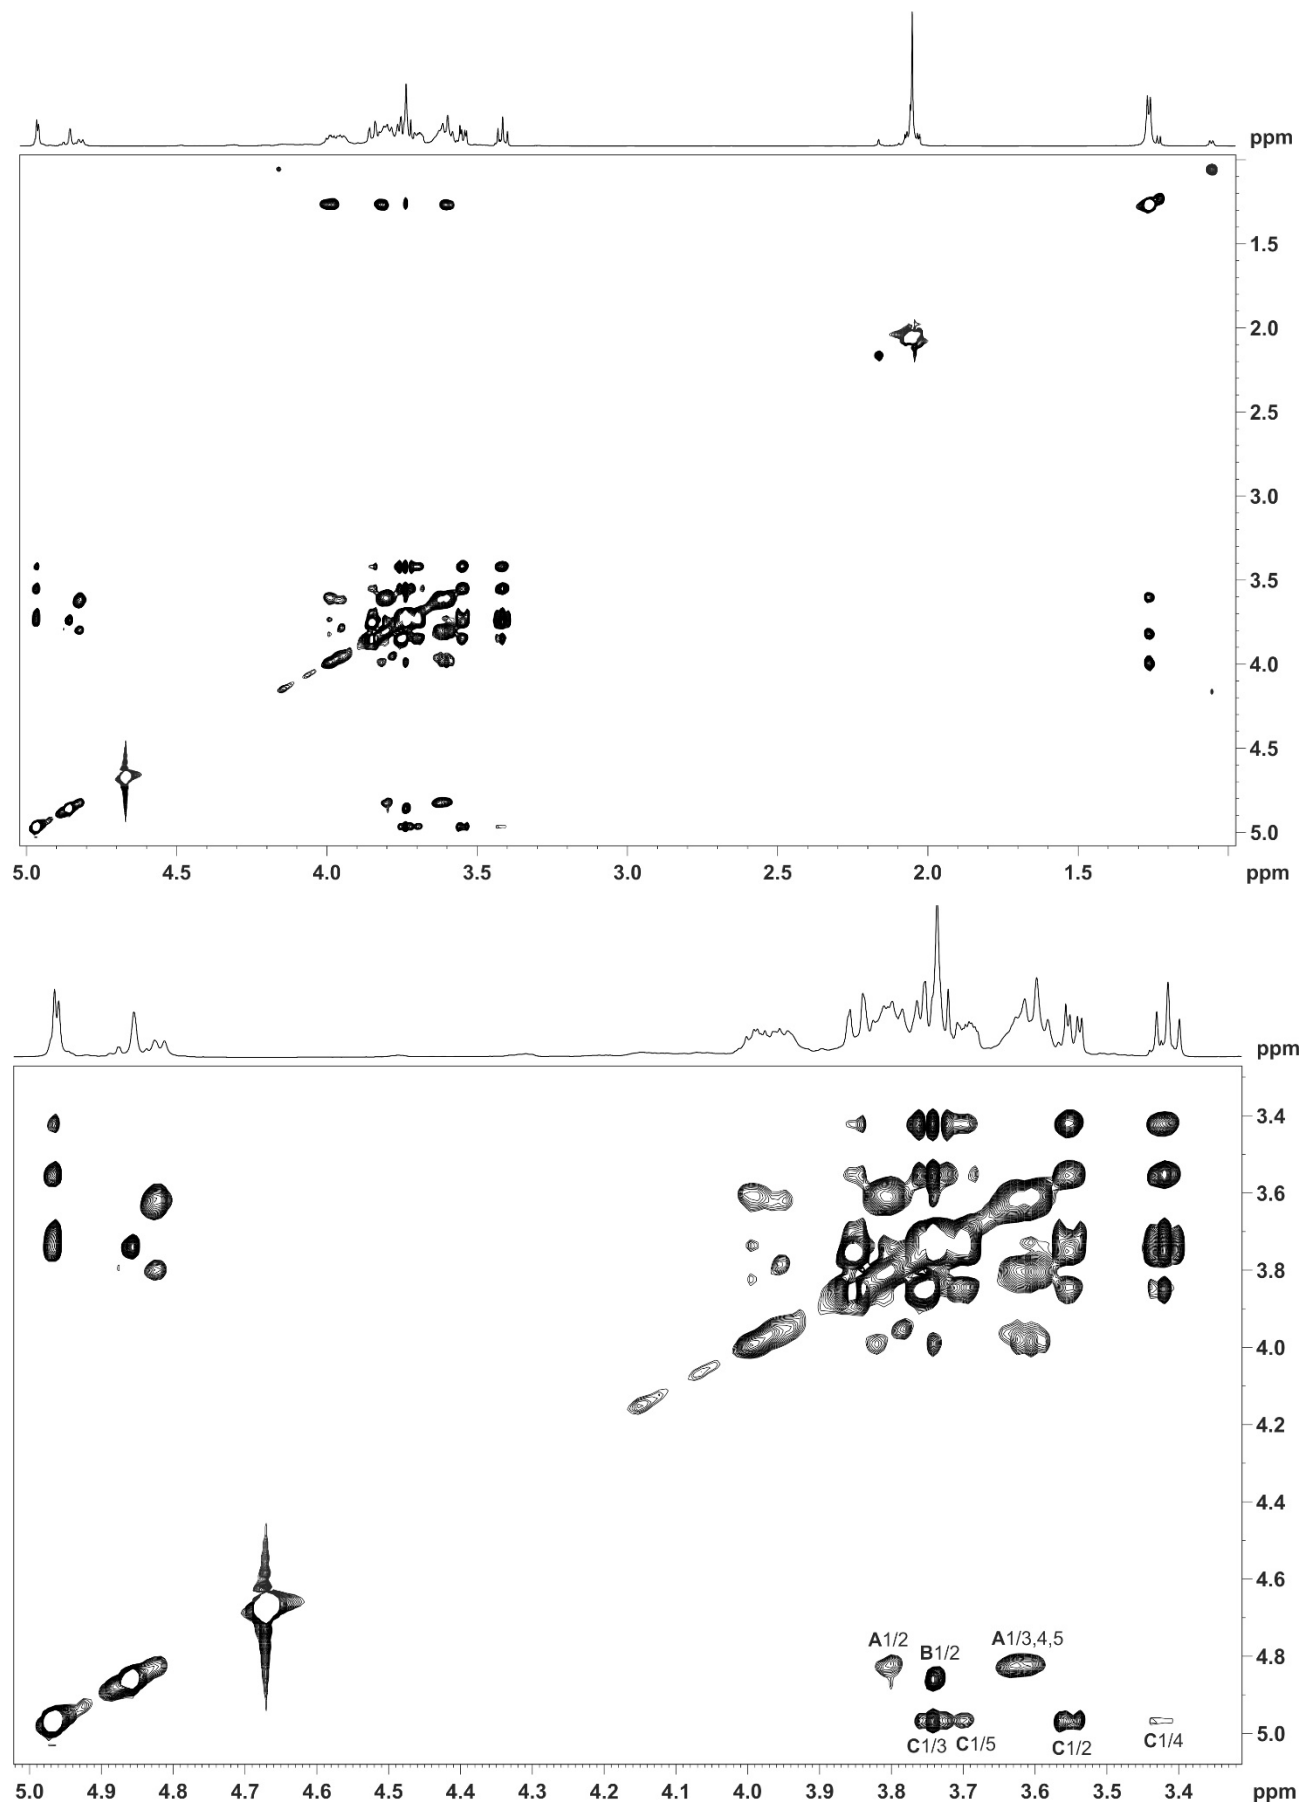

**Figure S2.** Full (top) and expanded (bottom)  $^1\text{H}, ^1\text{H}$  TOCSY spectrum. Correlations between anomeric and ring protons are indicated. Sugar residues are designated as **A** (GlcNAc), **B** (Rha) and **C** (Glc).

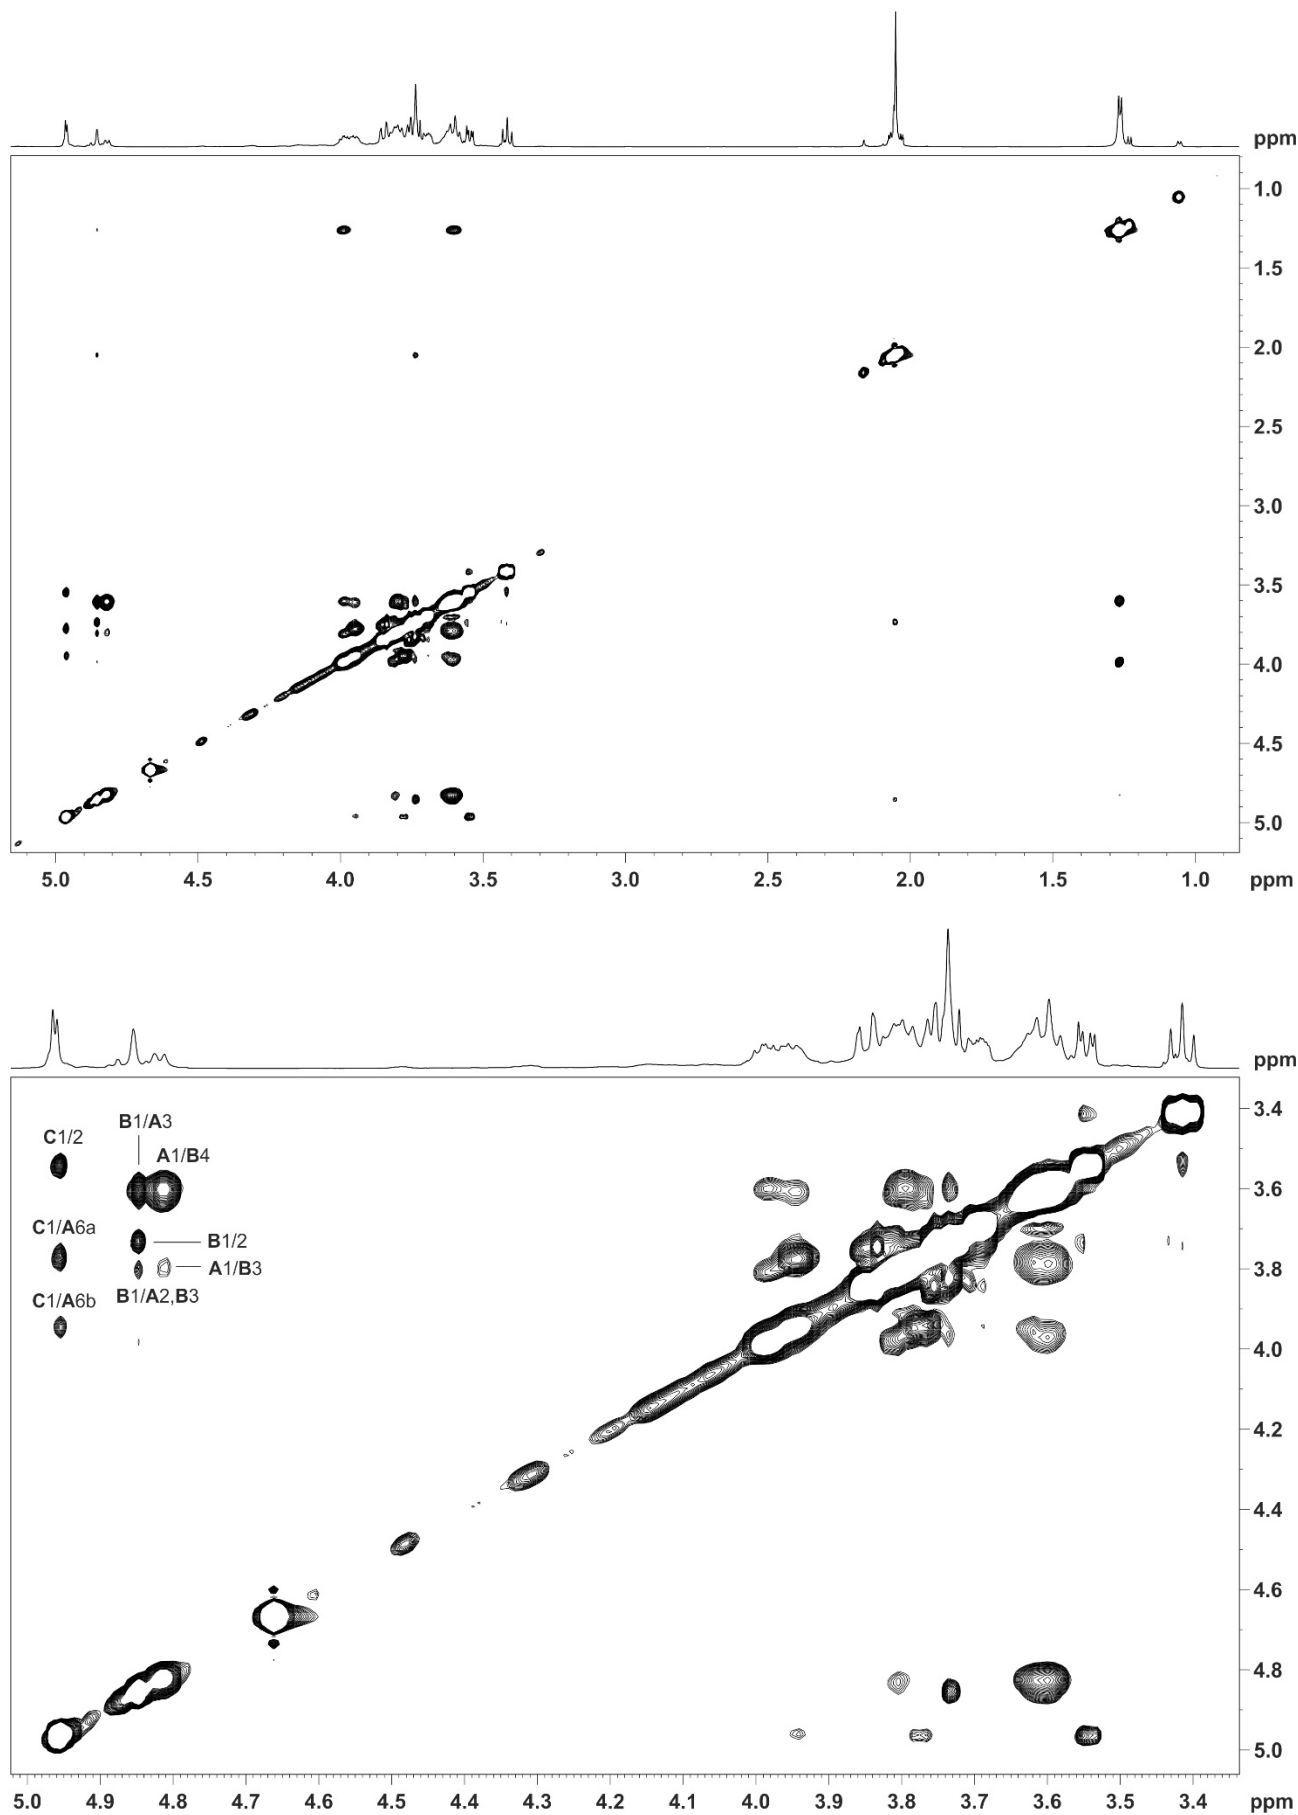

**Figure S3.** Full (top) and expanded (bottom)  $^1\text{H}$ ,  $^1\text{H}$  NOESY spectrum. Correlations between anomeric and ring protons are indicated. Sugar residues are designated as **A** (GlcNAc), **B** (Rha) and **C** (Glc).

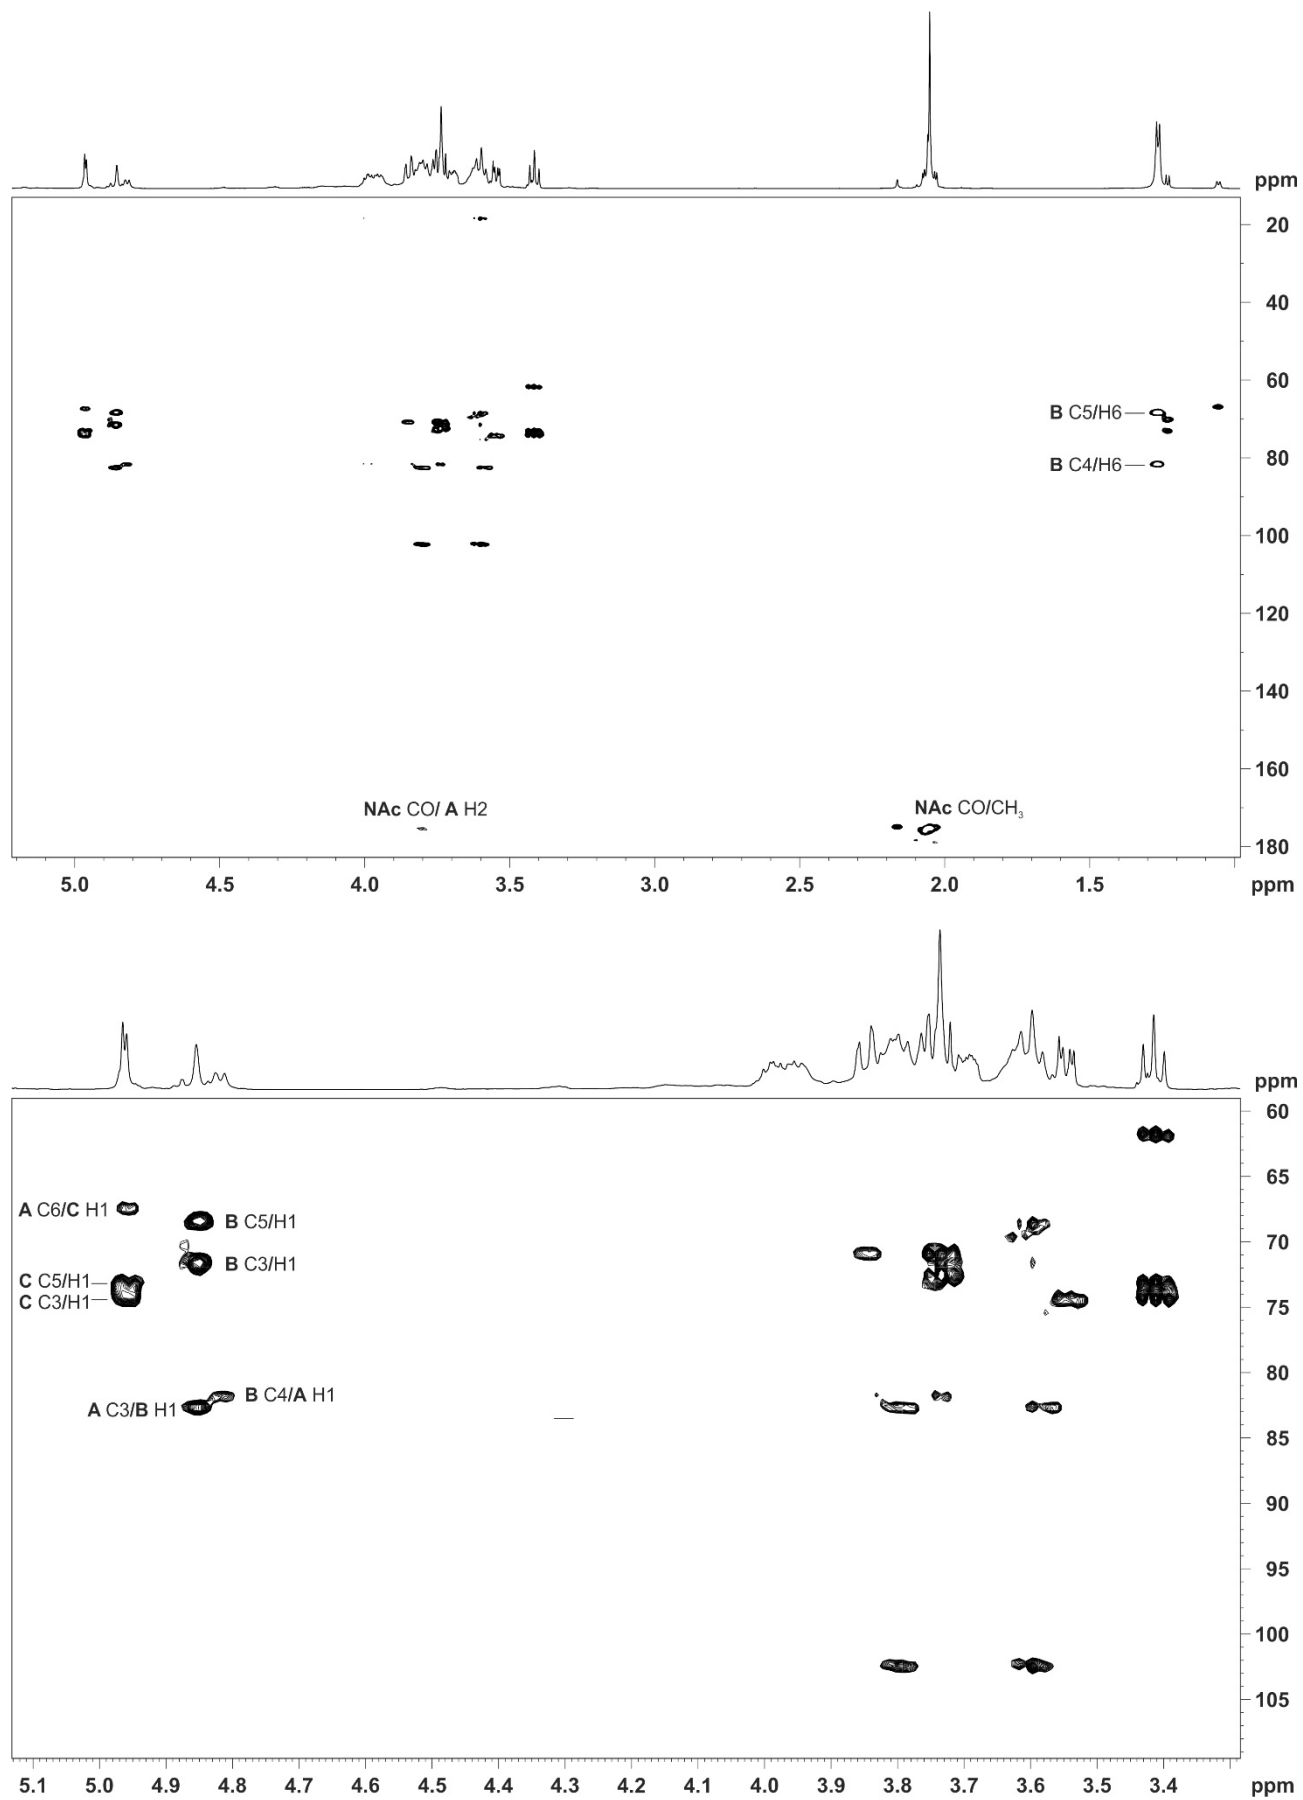

**Figure S4.** Full (top) and expanded (bottom)  $^1\text{H}$ ,  $^{13}\text{C}$  HMBC spectrum. The characteristic C/H correlations are indicated. Sugar residues are designated as **A** (GlcNAc), **B** (Rha) and **C** (Glc).
